# Supplementary material for: Efficacy of a new immunonutrition formula with extra virgin olive oil in the reduction of complications in surgeries of upper digestive tract tumors
Source: Frontiers journal article supplement (doi:10.3389/fnut.2024.1384145), 2024-05-28

## METHODS

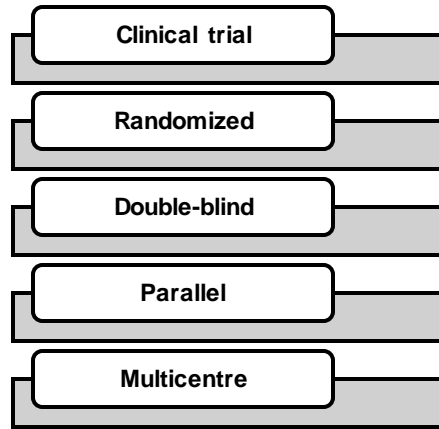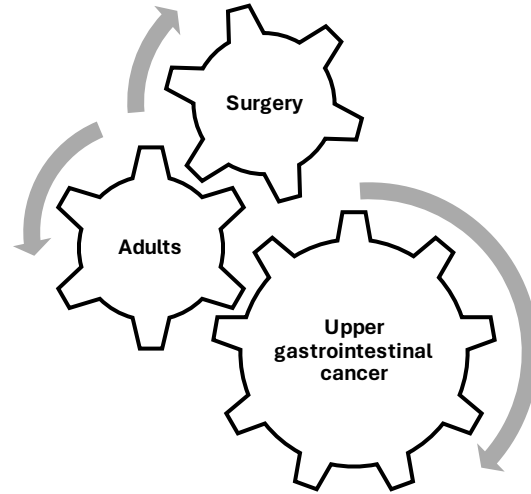

## FORMULAS (isocaloric & isoproteic)

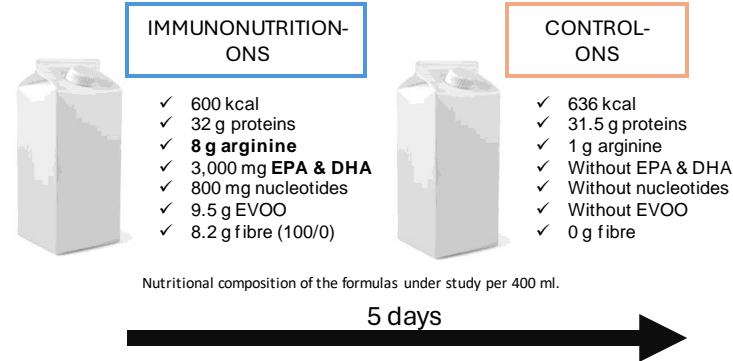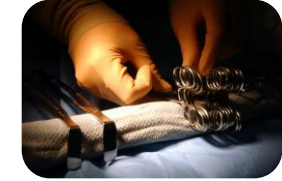

Surgery complications

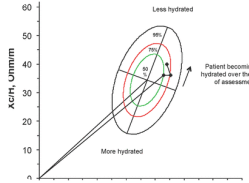

Body composition

## RESULTS

### IMMUNONUTRITION-ONS

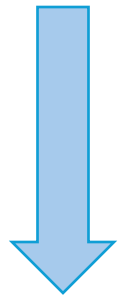

REINTERVENTION RATE

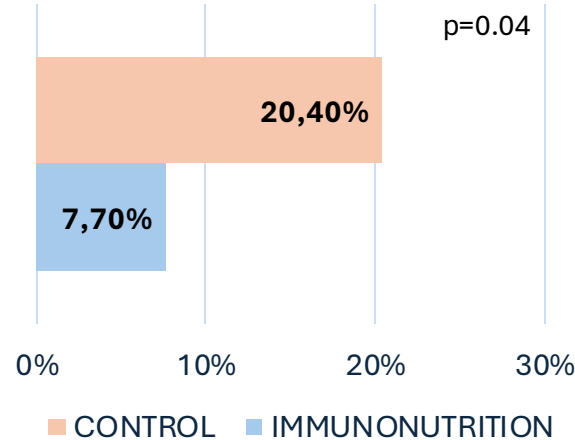

### IMMUNONUTRITION-ONS

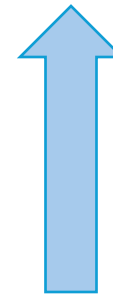

CELLULAR FUNCTION

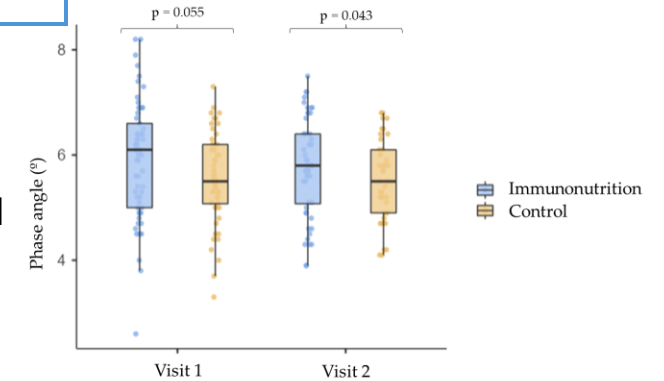

Supplement: Image_1.pdf [file Image_1.pdf]
